# Supplementary material for: Caspase-8 is required for HSV-1-induced apoptosis and promotes effective viral particle release via autophagy inhibition
Source: PubMed Central journal article supplement (PMC10070401; doi:10.1038/s41418-022-01084-y), 2022-11-24
Supplement: 41418_2022_1084_MOESM1_ESM.pdf [file 41418_2022_1084_MOESM1_ESM.pdf]

1 **SUPPLEMENTAL MATERIAL**

2

3 Uncropped Figures

4

5 **Fig S1 Caspase-8 is not activated on mitochondria of HSV-1-infected MEFs.** Anti-  
6 caspase-8 western blot analysis of mitochondrial extracts of MEFs either mock-infected (0  
7 h) or infected with 10 m.o.i. of SFV for 4, 8 and 14 h or with 10 m.o.i. of HSV-1 for 8, 14 and  
8 24 h. No caspase-8 is detected on mitochondria in mock-infected cells. SFV leads to  
9 mitochondrial translocation of p55 pro-caspase-8 in 4 h followed by its processing into active  
10 p43/p41 and p18 forms within 8-14 h. HSV-1 provokes mitochondrial translocation of pro-  
11 caspase-8 only at 24 h without its activation/processing. The  $\alpha$ -subunit of mitochondrial  
12 ATPase (complex V) served as a loading control.

13

14 **Fig S2 Caspase-8 activation does not depend on p38 MAPK activation in HSV-1-**  
15 **infected MEFs.** Caspase-8 (IETDase) activity assay of total extracts of wt MEFs either  
16 mock-infected (0 h) or infected with 10 m.o.i. of HSV-1 for 8, 14 and 24 h in the absence  
17 (NT) or presence of 20  $\mu$ M of the p38 MAPK inhibitor SB203580. Inhibition of p38 MAPK  
18 does not affect caspase-8 activation in response to HSV-1 infection. Data represent the  
19 means of 3-6 independent experiments  $\pm$  SD. Statistical evaluation by one-way ANOVA: \*\*p  
20 < 0.01; \*\*\*p < 0.001.

21

22

23

24

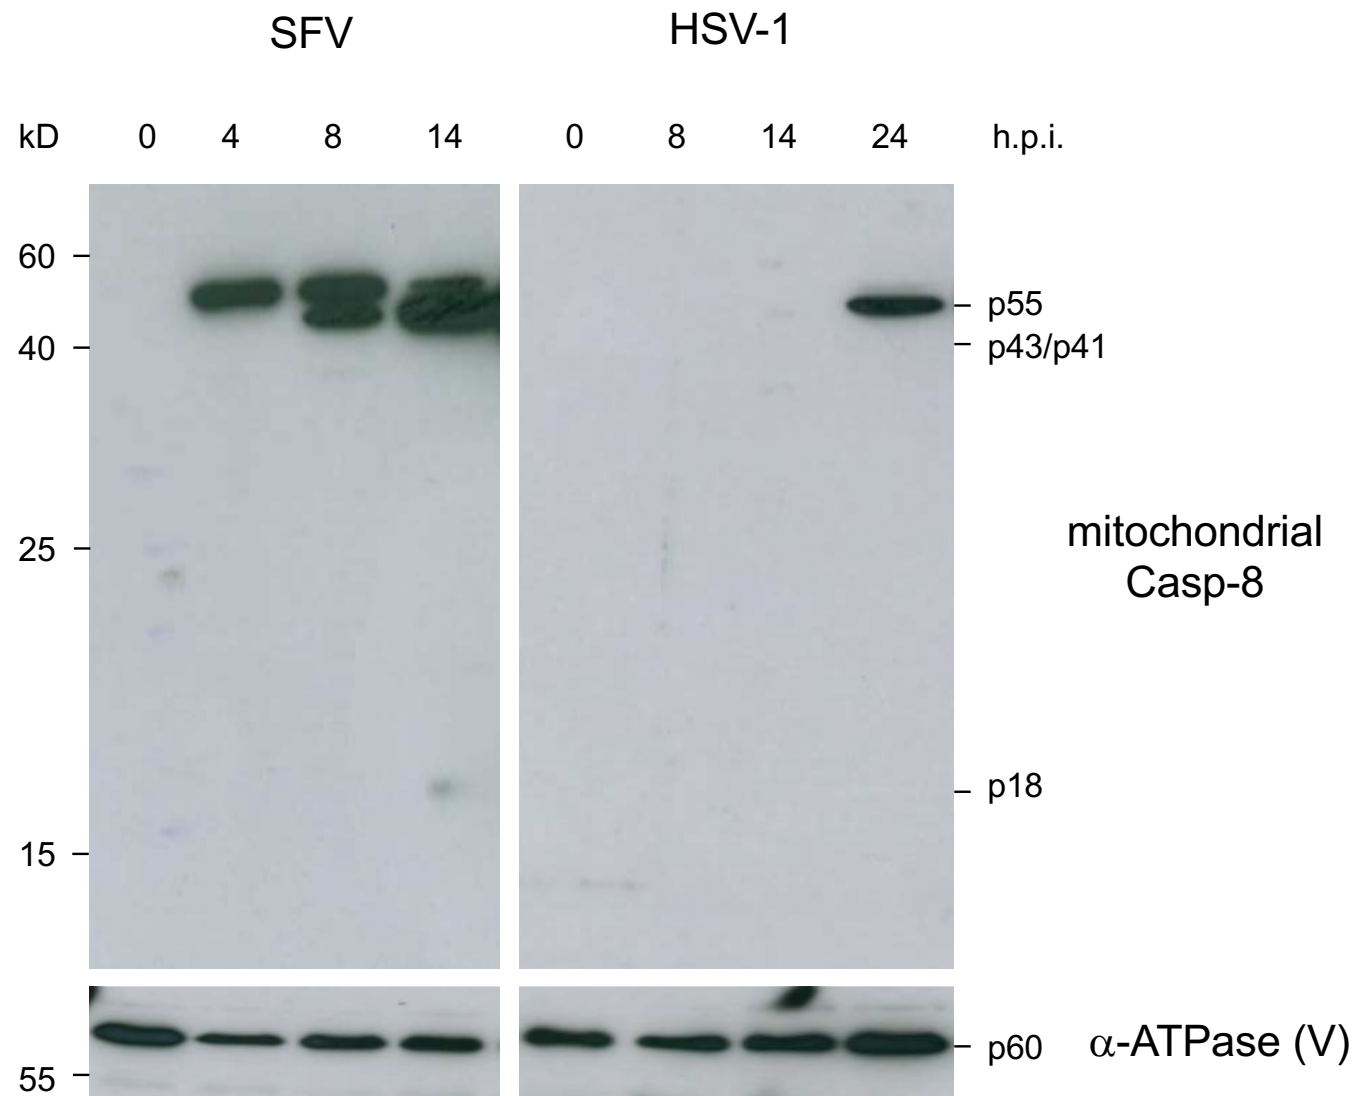

**Figure S1**

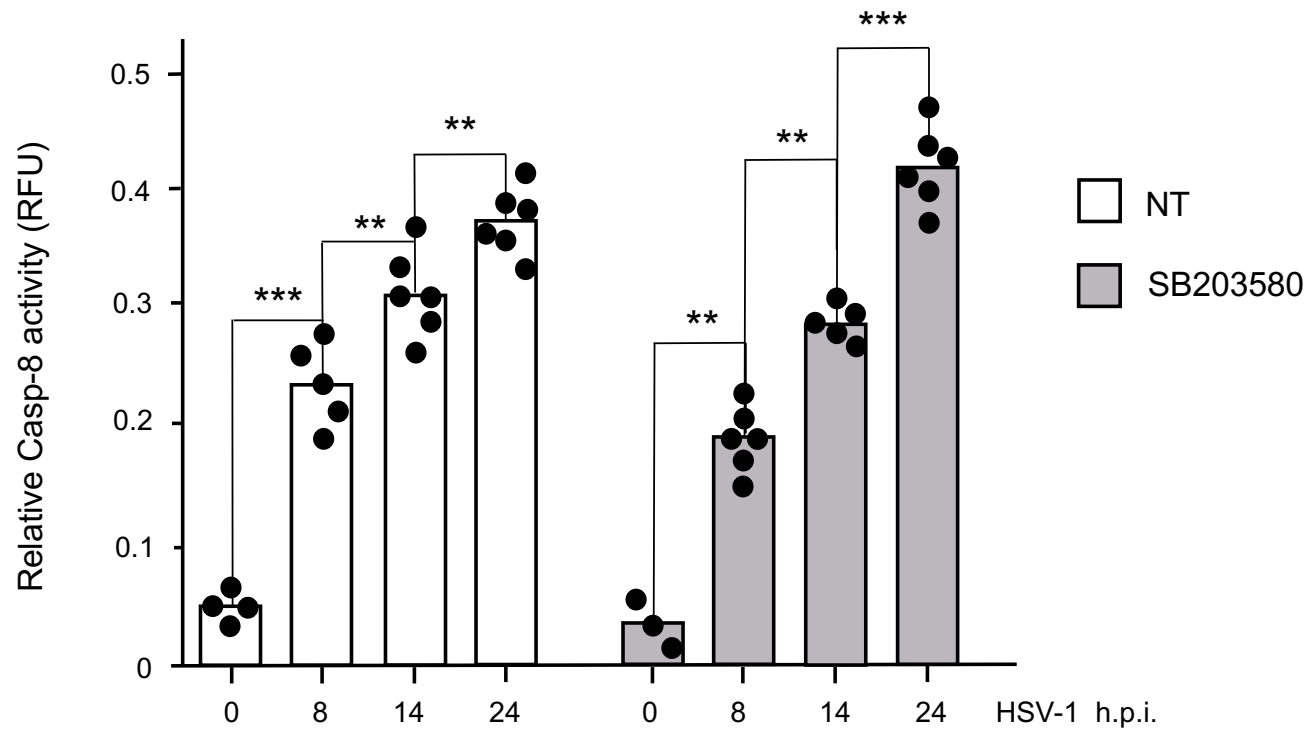

Figure S2

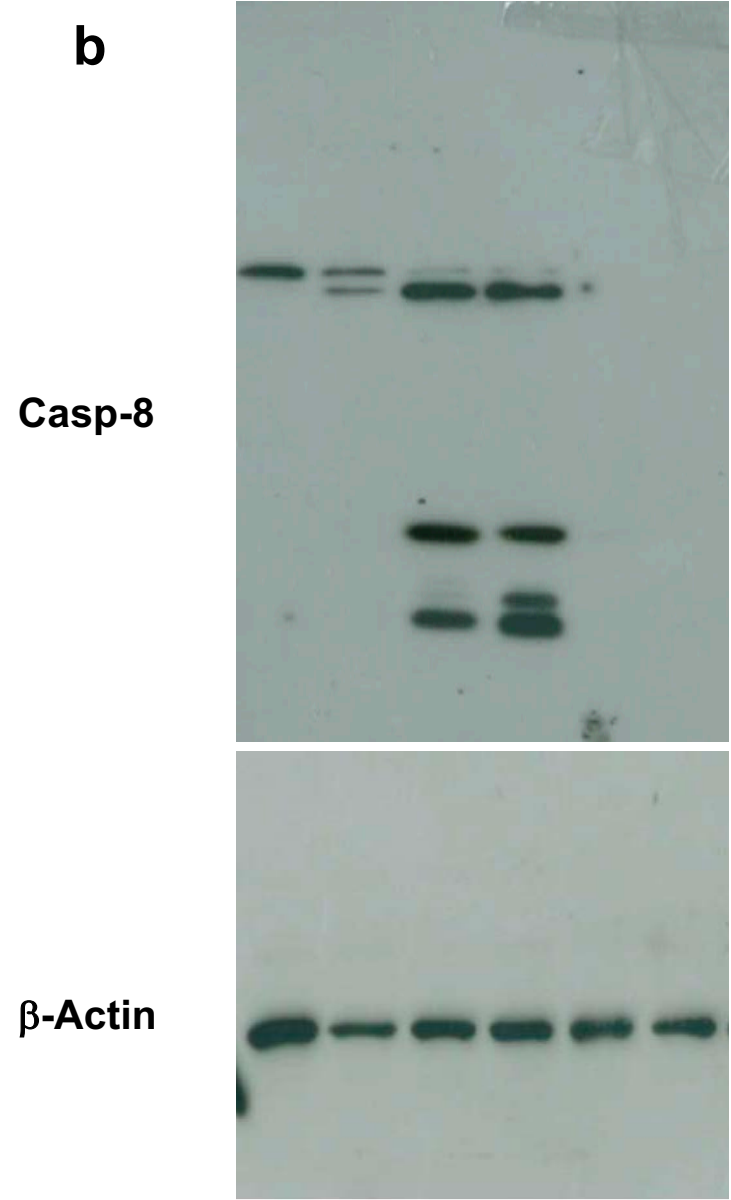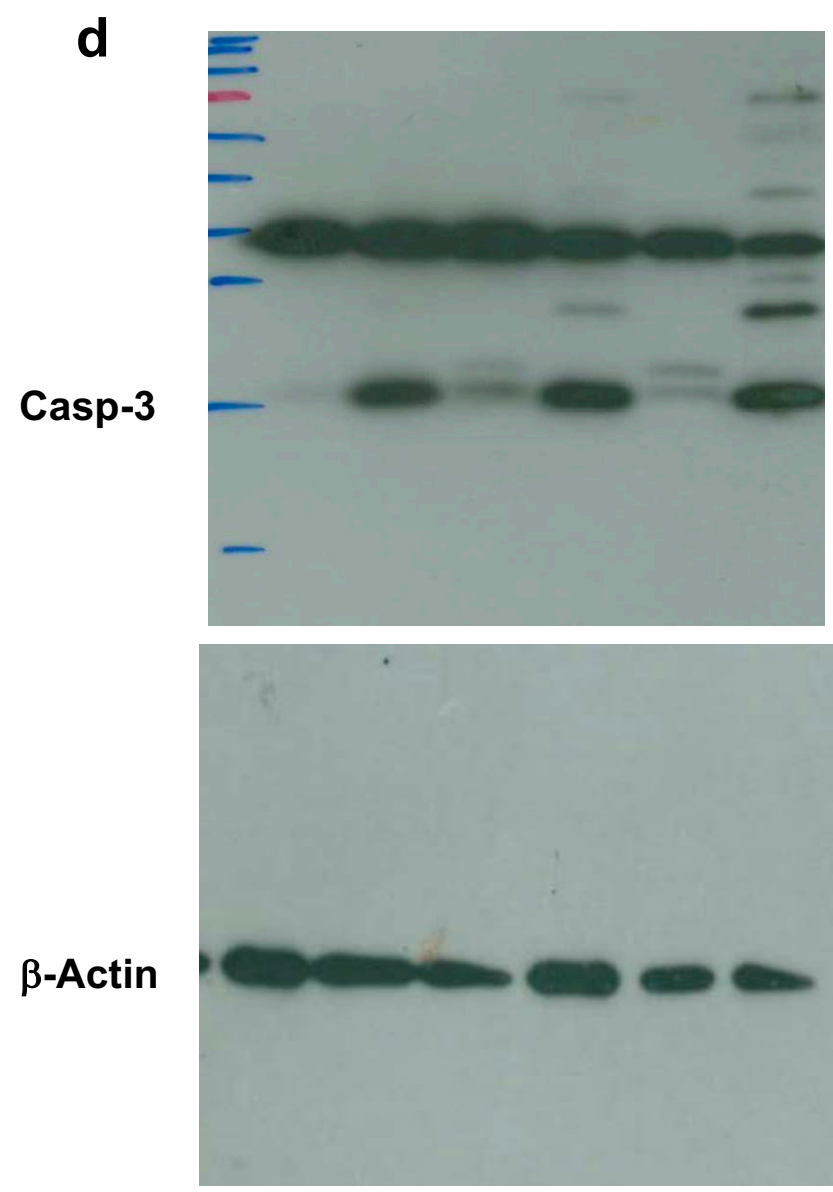

**Figure 1**

**c**

**p55/p41/43 Casp-8**

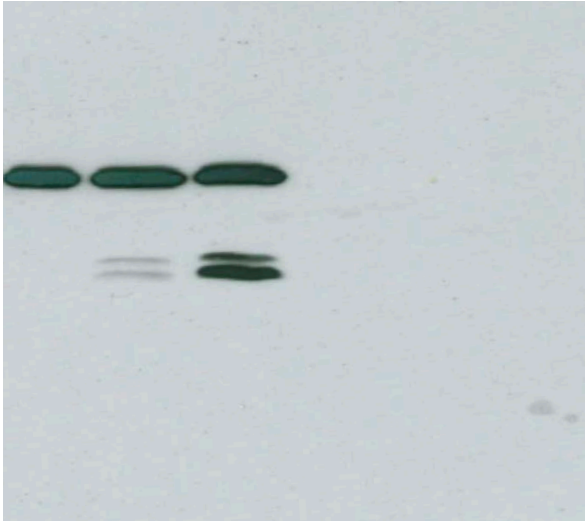

**Casp-3**

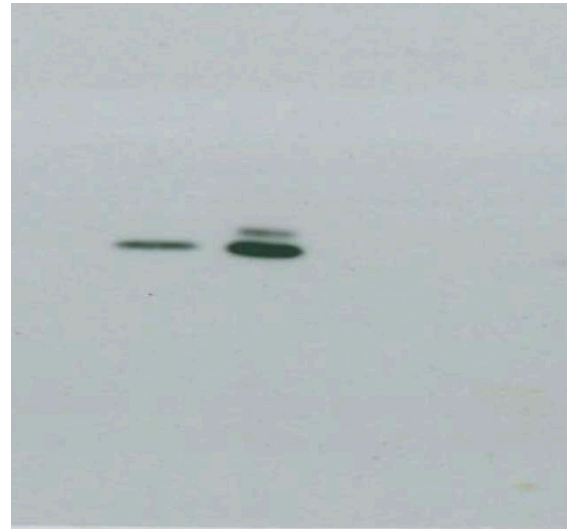

**p10/p18 Casp-8**

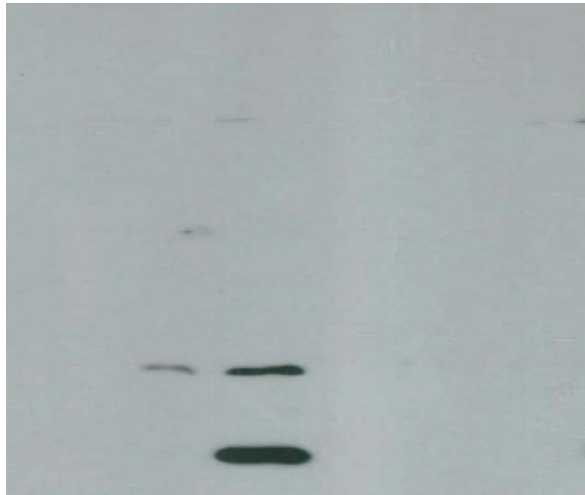

**gD**

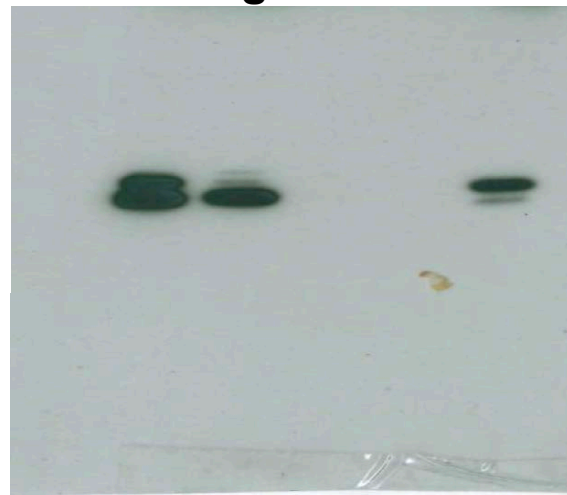

**$\beta$ -Actin**

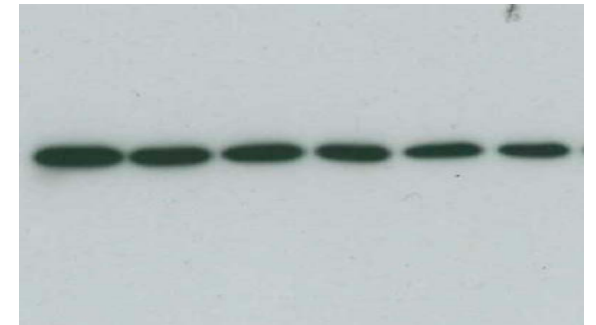

**Figure 2**

**a**

**wt**

**FADD KD**

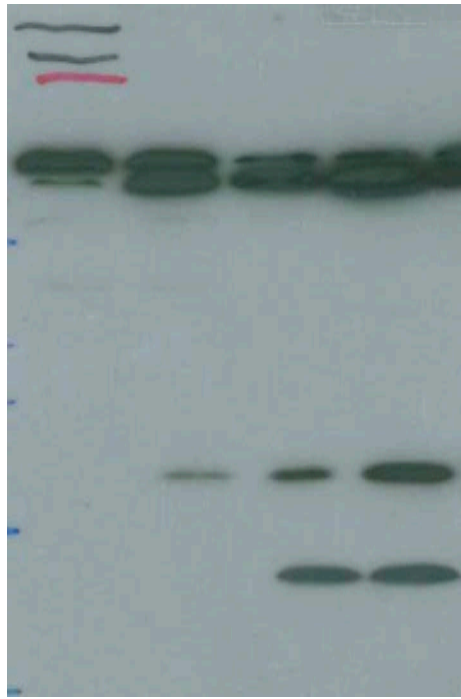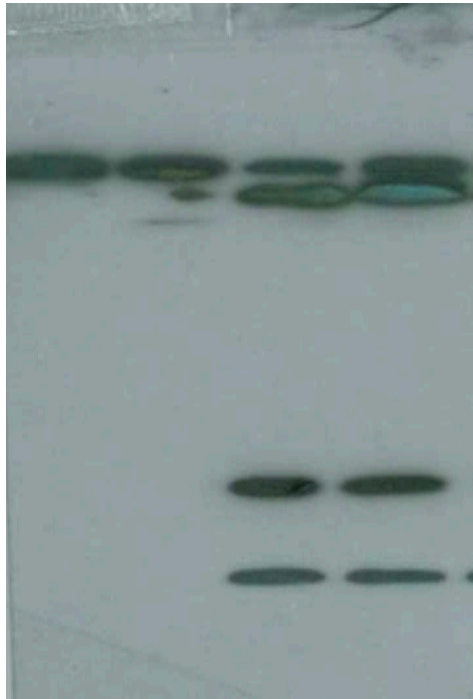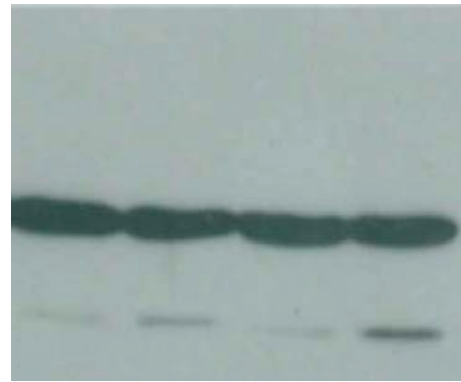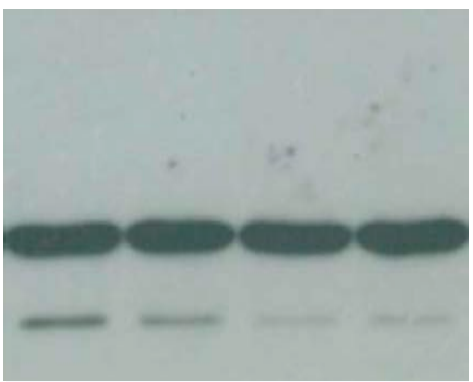

**b**

**FADD KD**

**wt**

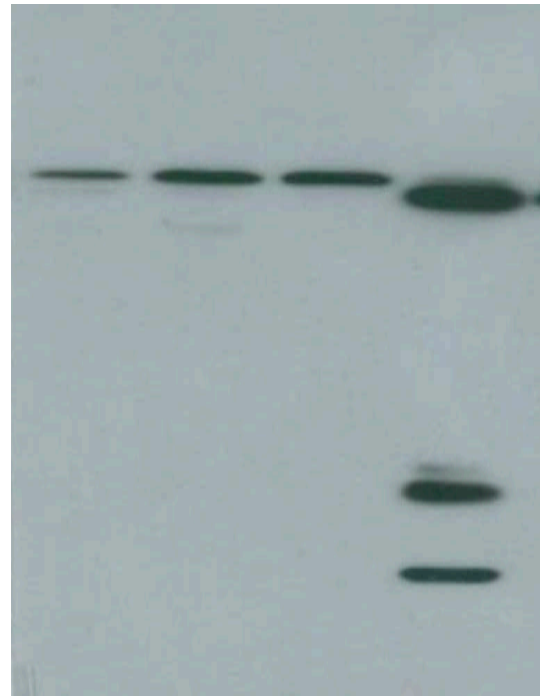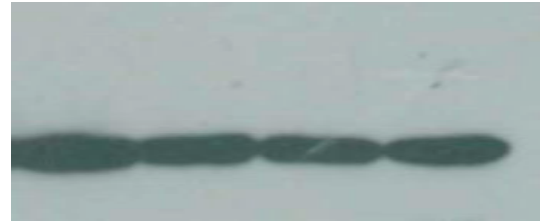

**Caspase-8**

**$\beta$ -Actin**

**Figure 3**

**C**

**wt**

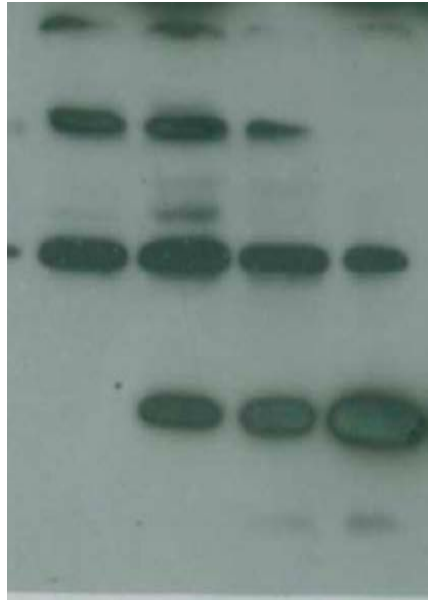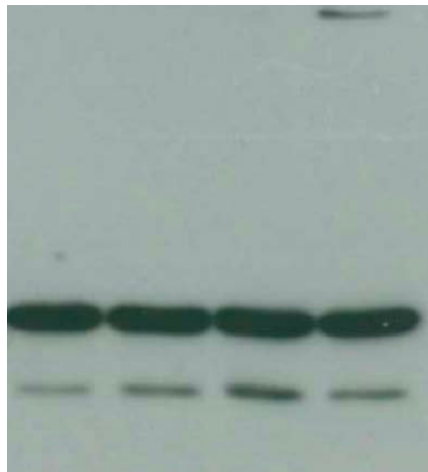

**FADD KD**

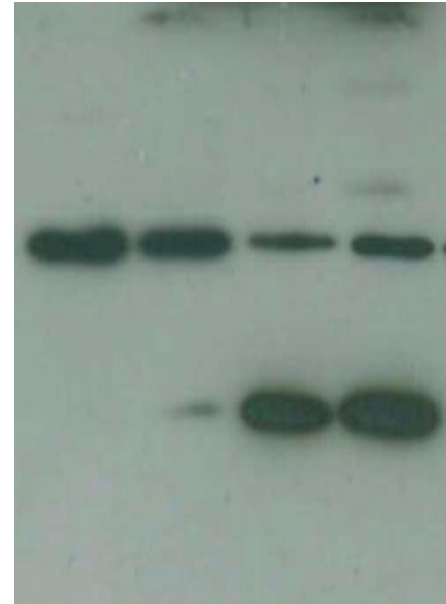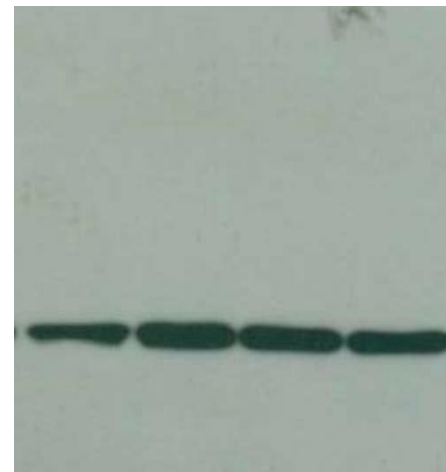

**Caspase-3**

**$\beta$ -Actin**

**Figure 3**

**e**

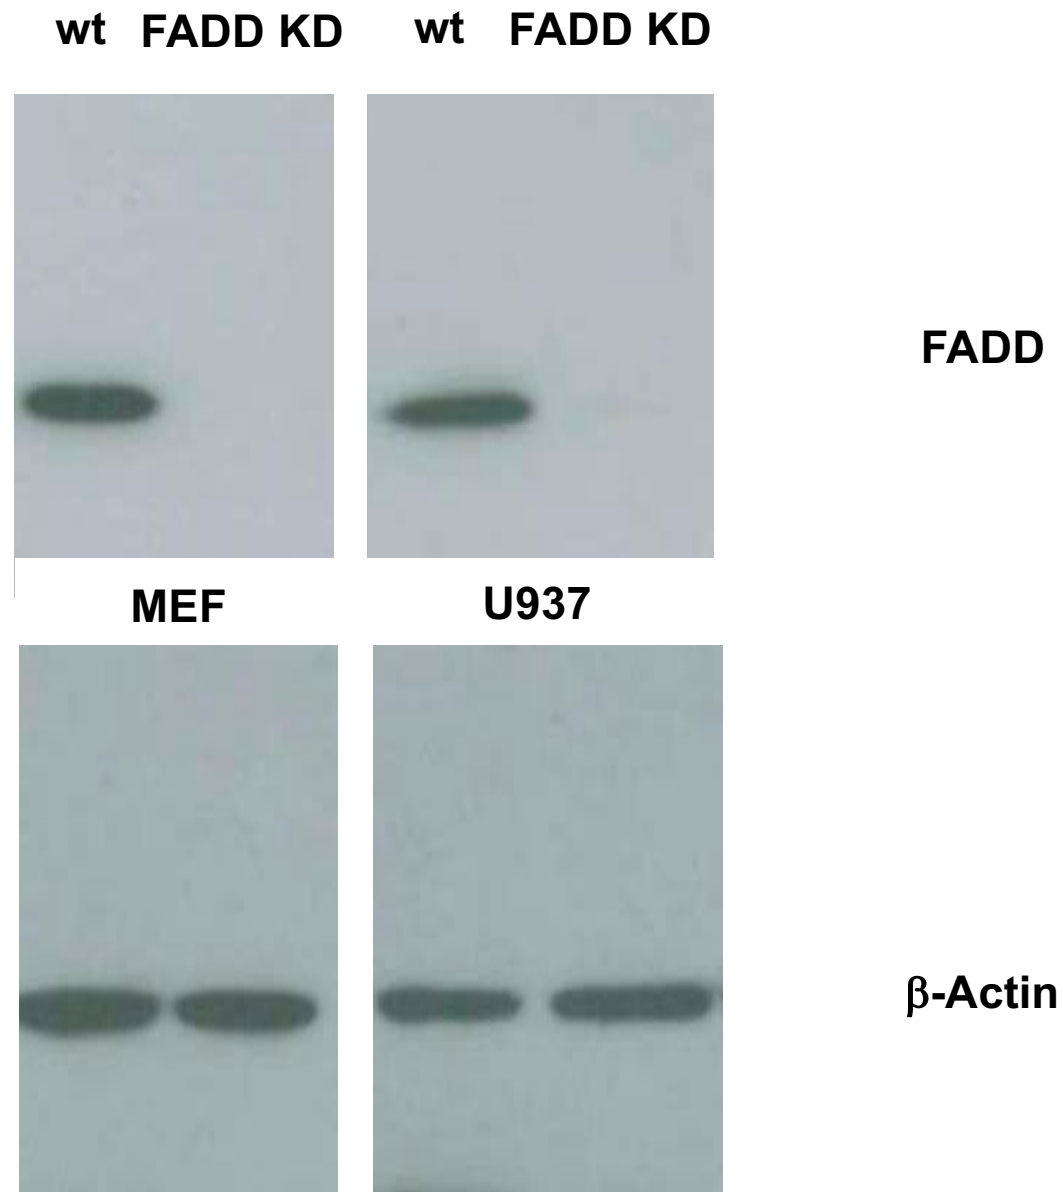

**Figure 3**



a

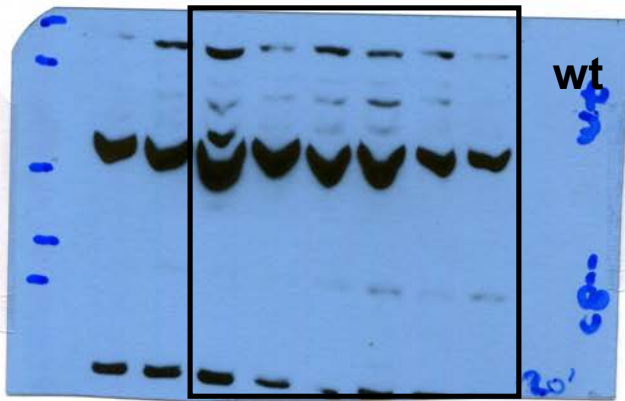

wt  
Beclin

Gel 1 wt cells

- 1 mock
- 2 HSV-1 4h
- 3 mock
- 4 HSV-1 8h
- 5 mock
- 6 HSV-1 16h
- 7 mock
- 8 HSV-1 24h

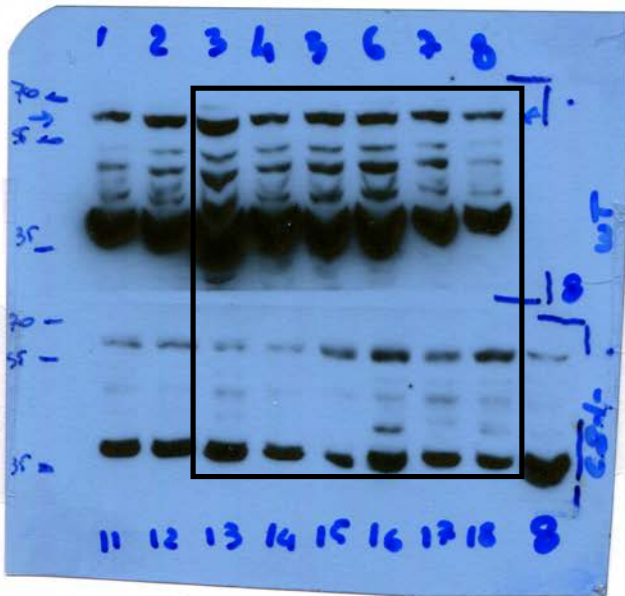

wt  
Beclin

C8-/-  
Beclin

Gel 2

- 11 mock
- 12 HSV-1 4h
- 13 mock
- 14 HSV-1 8h
- 15 mock
- 16 HSV-1 16h
- 17 mock
- 18 HSV-1 24h
- 8\* wt + HSV-1 24h

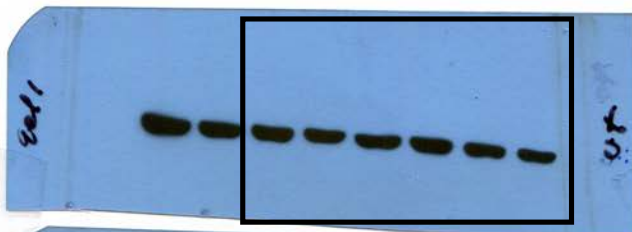

wt  
 $\beta$ -Actin

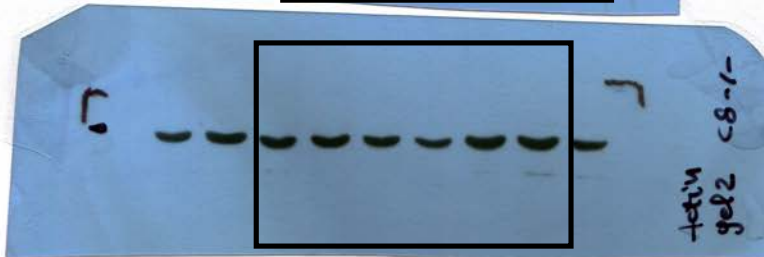

C8-/-  
 $\beta$ -Actin

Figure 5

C

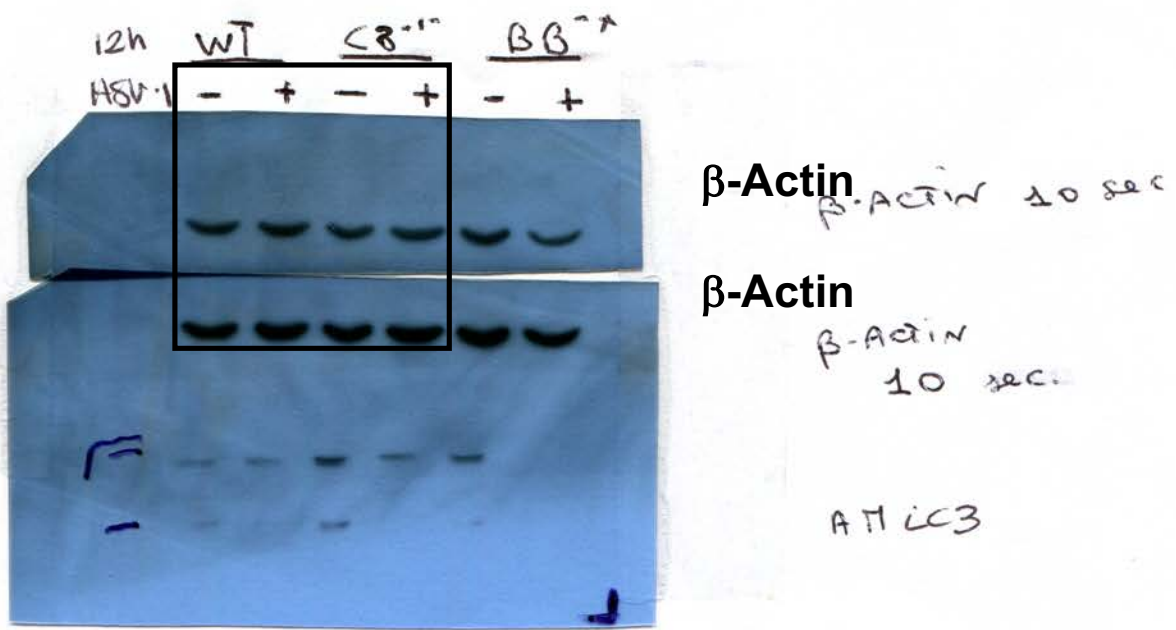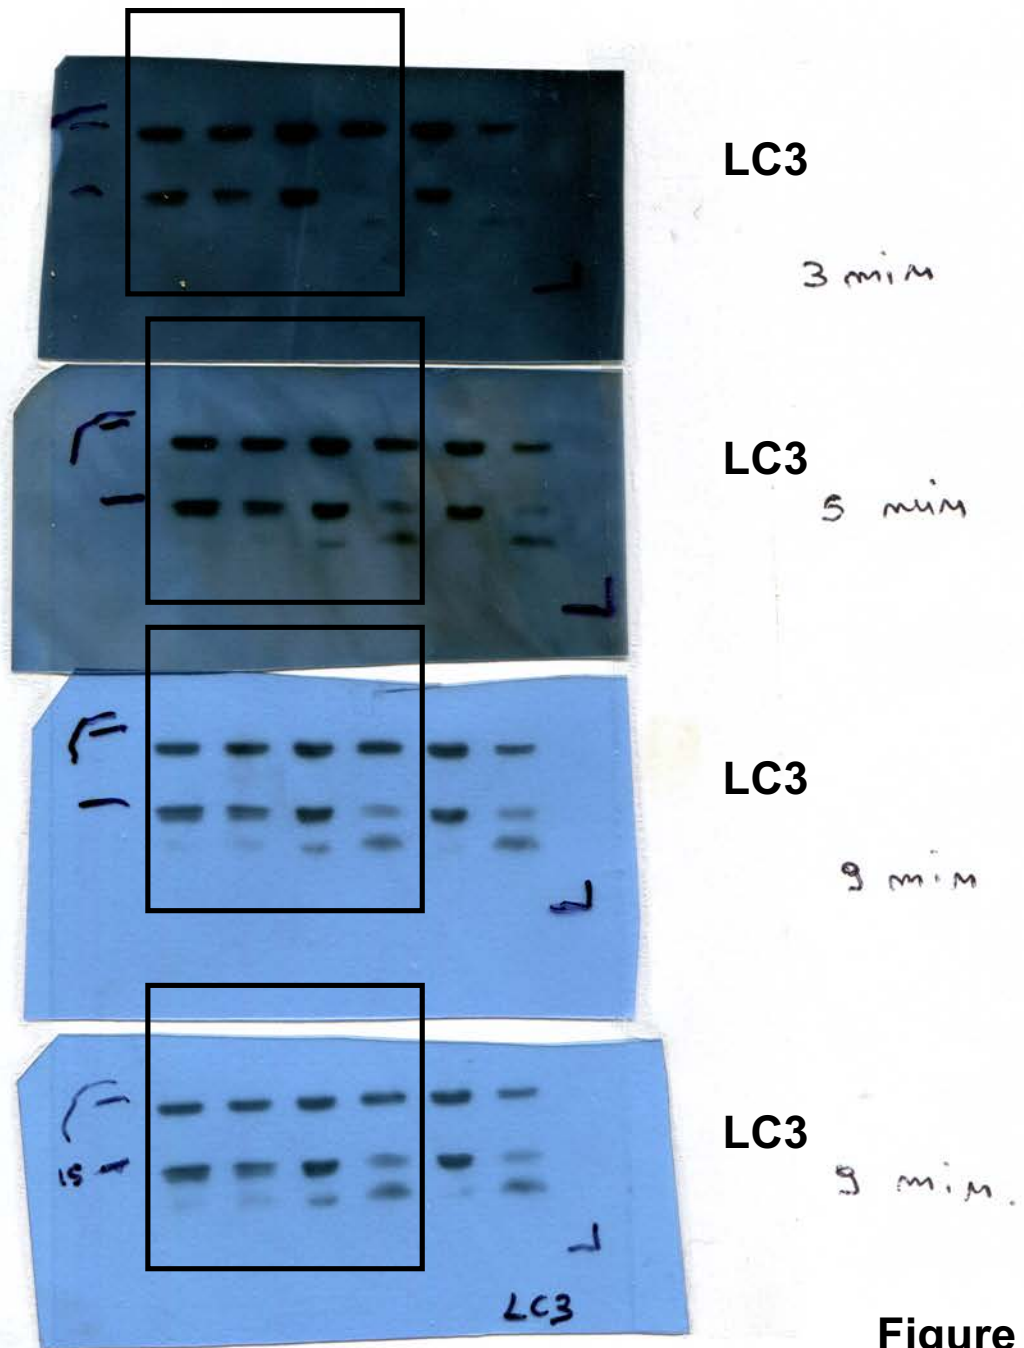

Figure 5

**e**

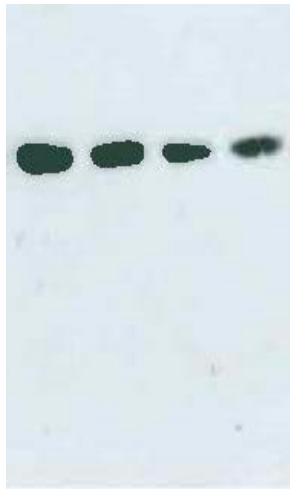

**wt Beclin-1**

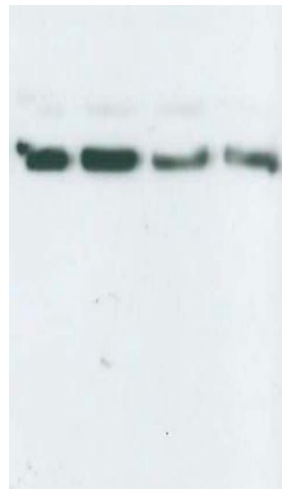

**C3-/- Beclin-1**

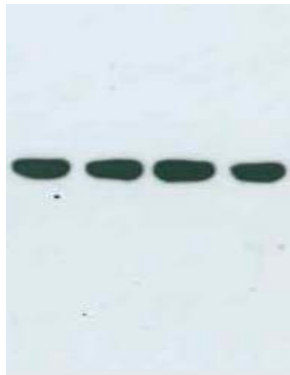

**wt  $\beta$ -Actin**

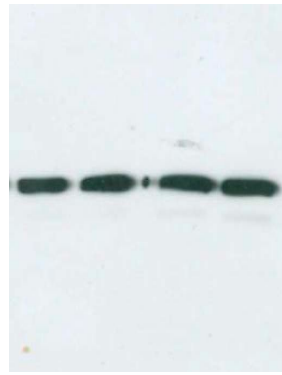

**C3-/-  $\beta$ -Actin**

**f**

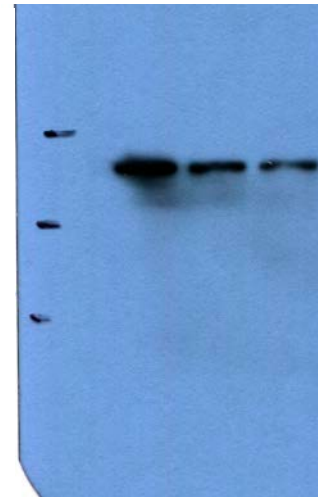

**Beclin-1  $\pm$  Casp Inh**

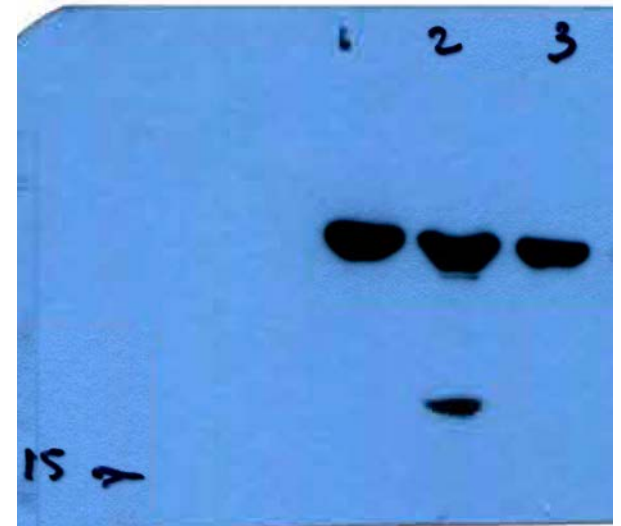

**Casp-3  $\pm$  Casp Inh**

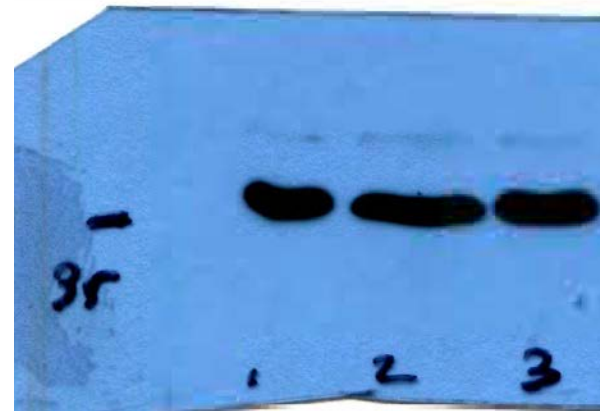

**Actin  $\pm$  Casp Inh**

**Figure 5**

**g**

**Casp-8<sup>-/-</sup>**

**wt**

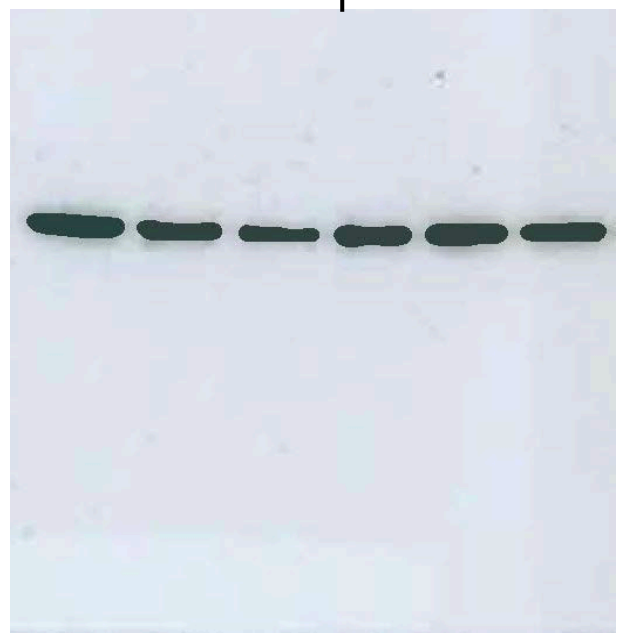

**p62**

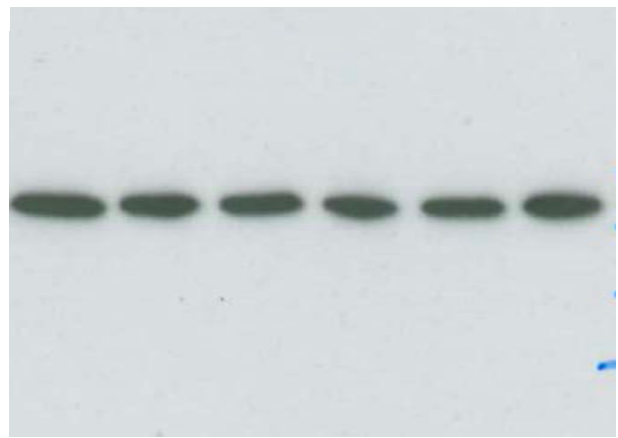

**β-Actin**

**Figure 5**

**a**

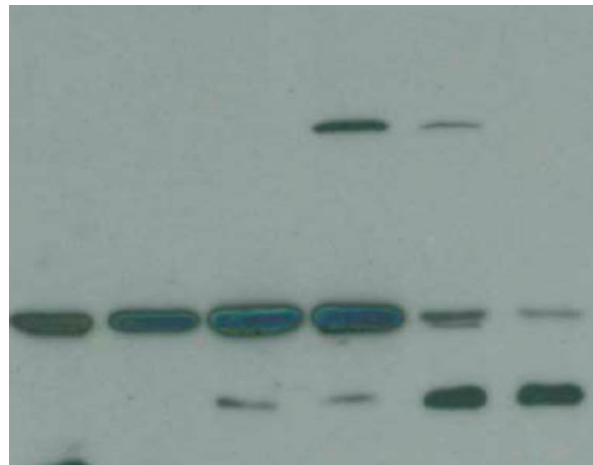

**LC3-I/II**

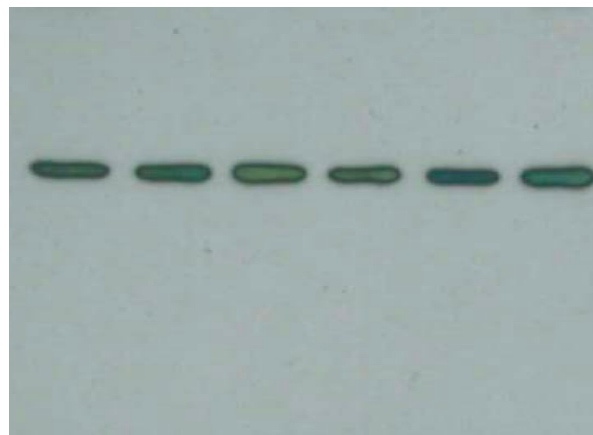

**β-Actin**

**Figure 6**

**SFV-1**

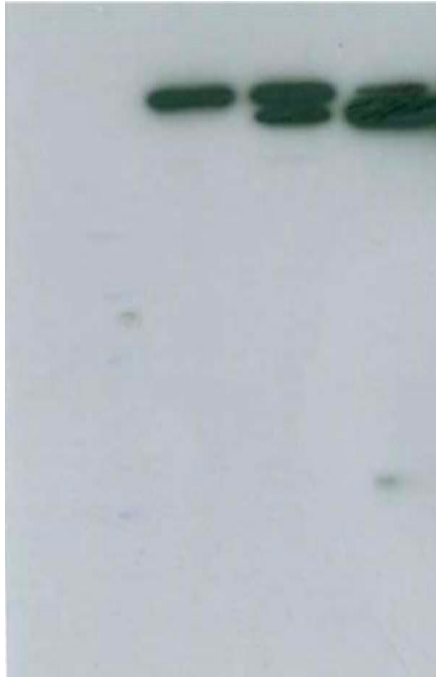

**HSV-1**

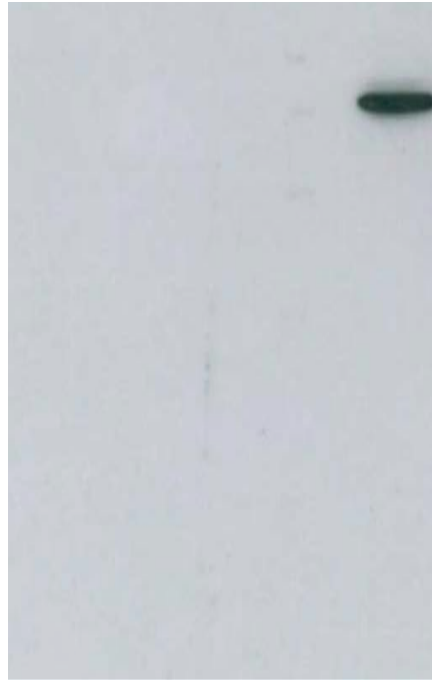

**Mitochondrial  
Caspase-8**

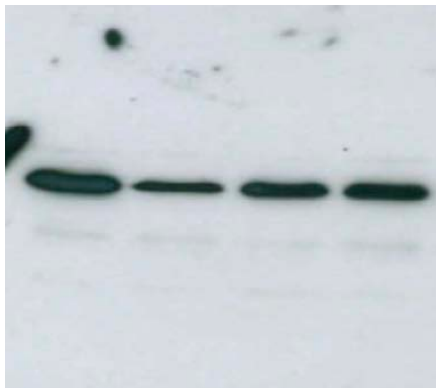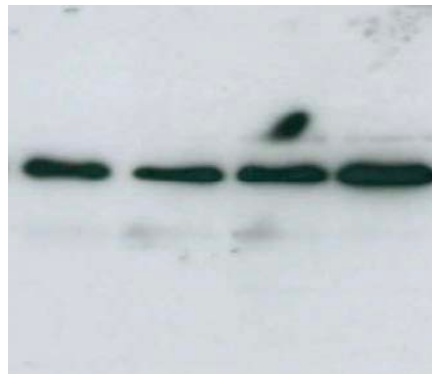

**$\alpha$ -ATPase (V)**

**Suppl. Figure 1**
